# Supplementary material
Source: PubMed Central journal article supplement (PMC2812899)
Supplement: NIHMS169718-supplement-1_si_001.pdf [file NIHMS169718-supplement-1_si_001.pdf]

## SUPPORTING INFORMATION

# Optical Properties of Nested Pyramidal Nanoshells

*Julia Y. Lin<sup>†</sup>, Warefta Hasan<sup>†</sup>, Jiun-Chan Yang<sup>†</sup> and Teri W. Odom<sup>†,‡,\*</sup>*

<sup>†</sup>Department of Chemistry, <sup>‡</sup>Department of Materials Science and Engineering, Northwestern University, 2145 Sheridan Road, Evanston, Illinois 60208-3113

\* To whom correspondence should be addressed. E-mail: [todom@northwestern.edu](mailto:todom@northwestern.edu).

Telephone number: 847-491-7674

Fax number: 847-497-7713

Email address: [todom@northwestern.edu](mailto:todom@northwestern.edu)

**Table 1.** Au to Cr ratio in nested pyramidal shells correlated with etching time

| etching time (s) | Cr (atomic %) | Au (atomic %) |
|------------------|---------------|---------------|
| 0                | 49            | 51            |
| 30               | 25            | 75            |
| 45               | 12            | 88            |
| 60               | 1             | 99            |
| 80               | 0             | 100           |

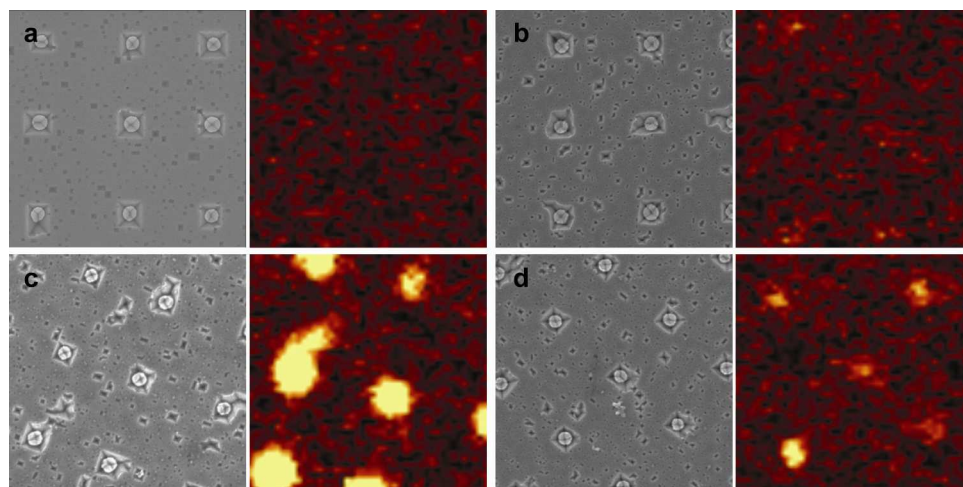

**Figure S1.** SEM images and corresponding Raman intensity maps of (a) single 40 nm Au, (b) collapsed nested (gap = 5 nm), (c) nested (gap = 30 nm), and (d) Au-Cr-Au (20-45-20 nm) multi-layered pyramidal shells. SEM and Raman image areas are  $5 \mu\text{m} \times 5 \mu\text{m}$ .
